# Supplementary material
Source: publisher site journal article supplement (https://www.spandidos-publications.com/1443/downloadSupplementary)

Figure S1. (A-C) Knockdown and overexpression/transfection efficiency of NFATC2 siRNA and ca.STIM1 expression plasmid, respectively. (A) Expression of NFATC2 mRNA in 293T cells transfected with 1, 2 or 4  $\mu\text{g}$  NFATC2 siRNA. (B) Expression of NFATC2 protein in 293T cells transfected with 4  $\mu\text{g}$  NFATC2 siRNA. (C) Fluorescence intensity in 293T cells transfected with RFP-labeled ca.STIM1 plasmid (1, 2, 4, 8 or 16  $\mu\text{g}$ ). (D) Relative STIM1 mRNA expression in 293T cells transfected with ca.STIM1 plasmid (1, 2, 4, 8 or 16  $\mu\text{g}$ ). (E) NFATC2 protein expression after transfection of STIM1<sup>wt</sup> and STIM1<sup>p.R304W</sup> cells with NFATC2 siRNA. (F) STIM1 protein expression after transfection of STIM1<sup>p.R304W</sup>, STIM1<sup>p.R429c</sup> and STIM1<sup>p.E136X</sup> cells with ca.STIM1. Values are expressed as the mean  $\pm$  standard deviation (n=3). \*P<0.05, \*\*P<0.01 vs. Control plasmid or Scrambled siRNA. STIM1, stromal interaction molecule 1; siRNA, small interfering RNA; RFP, red fluorescence protein; ca.STIM1, plasmid expressing wild type STIM1.

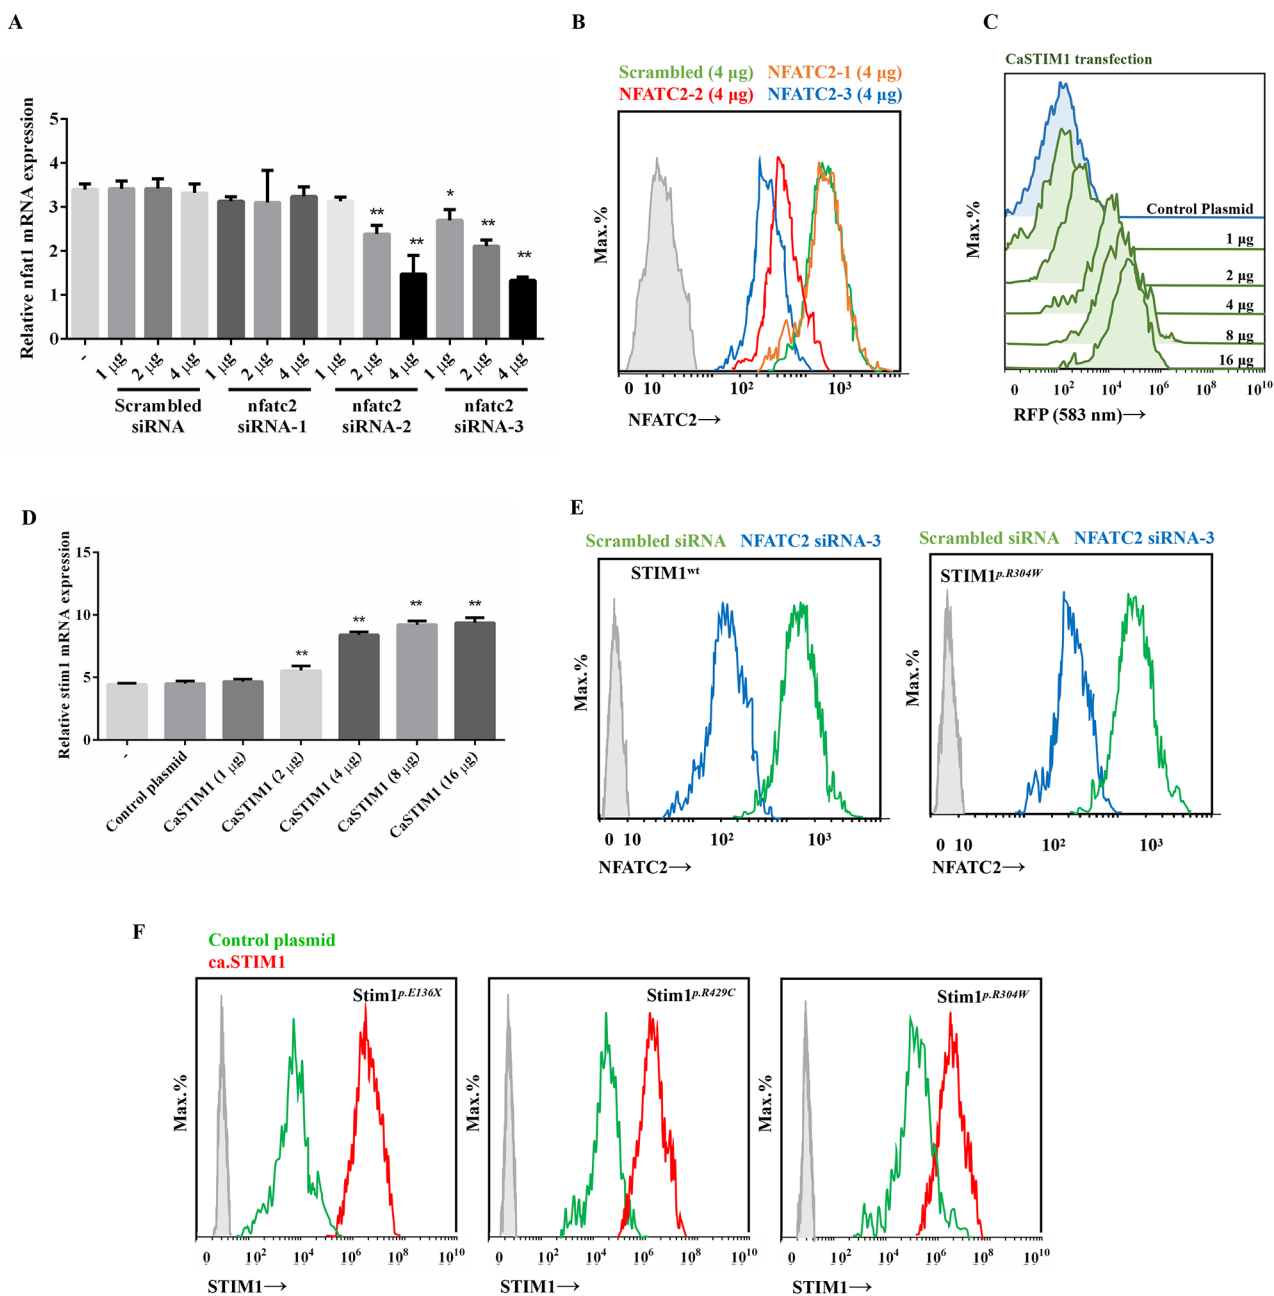

Supplement: Supplementary file 1 [file downloadSupplementary]
